# Supplementary material for: Kukoamine B promotes TLR4-independent lipopolysaccharide uptake in murine hepatocytes
Source: PubMed Central journal article supplement (PMC5295368; doi:10.18632/oncotarget.11292), 2016-08-15
Supplement: oncotarget-07-57498-s001.pdf [file oncotarget-07-57498-s001.pdf]

## Kukoamine B promotes TLR4-independent lipopolysaccharide uptake in murine hepatocytes

### Supplementary Material

**Table S1: Quantitative real-time PCR primers.**

|                      |                                                                                   |
|----------------------|-----------------------------------------------------------------------------------|
| mouse ASGPR          | Sense: 5'- CCAGCTCTGAGTCTGTTAGCC-3'<br>Antisense: 5'- CAGATCTTCCCGGAGTTGGG-3'     |
| mouse MARCO          | Sense: 5'- AGAAAGGGAGACACTGGAAGC -3'<br>Antisense: 5'- CCTCTGGAGTAACCGAGCAT-3'    |
| mouse SR-B1          | Sense: 5'- ATCTGGTGGACAAATGGAA -3'<br>Antisense: 5'- GAAGCGATACGTGGGAAT -3';      |
| mouse $\beta$ -actin | Sense: 5'-CTGTCCCTGTATGCCTCTG-3'<br>Antisense: 5'- ATGTCACGCACGATTTCC-3'.         |
| mouse TLR4           | Sense: 5'-TTTATTCAGAGCCGTTGG-3'<br>Antisense: 5'- AGTTGCCGTTTCTTGTTTC-3'          |
| mouse TFRC           | Sense: 5'- TCATGAGGGAAATCAATGATCGTA-3'<br>Antisense: 5'- GCCCCAGAAGATATGTCGGAA-3' |
| mouse SR-A           | Sense: 5'- ATTGGGAAATGAAGAACTGC-3'<br>Antisense: 5'- GGACTGACGAAATCAAGGAA-3       |
| mouse LOX-1          | Sense: 5'- GCATGAATTTGGAAATGACTTTTGA-3<br>Antisense: 5'- TCTGCCCTTCCAGGATACGA-3'  |

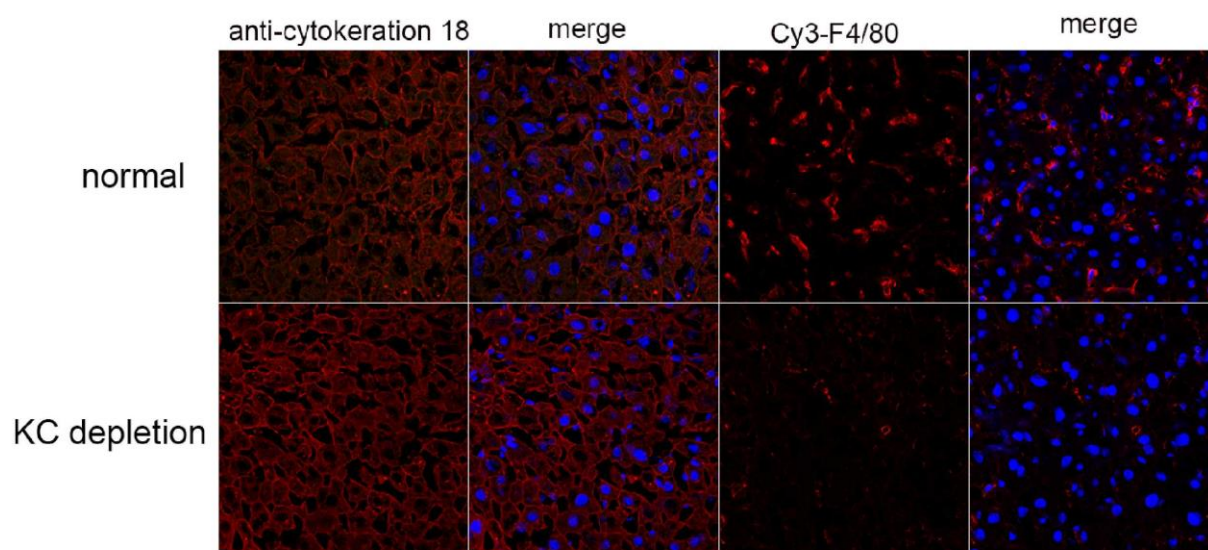

**Figure S1: KCs in liver tissue were depleted by Clophosome.** C57 BL/6 mice were injected with Clodronate liposomes (140  $\mu$ l/20 g) or sterilizing NS for 48 h. Frozen liver sections were prepared and markers for HCs (cytokeratin 18) and KCs (F4/80) were detected by confocal microscopy (objective $\times$ 40). Nuclei were stained by DAPI (blue).

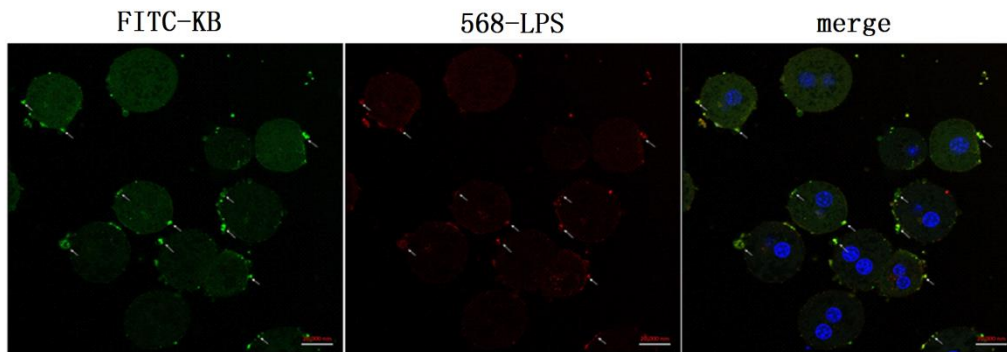

**Figure S2: Colocalization of KB with LPS in cultured HCs.** HCs from WT mice were treated with Alexa Fluor®568-conjugated LPS (1  $\mu\text{g}/\text{ml}$ ) preincubated with FITC-KB (15  $\mu\text{M}$ ) for 30 min *in vitro*. FITC-KB (green) and Alexa Fluor®568-conjugated LPS (orange-red) colocalization was detected on HC cell membranes by confocal microscopy 30 min later.

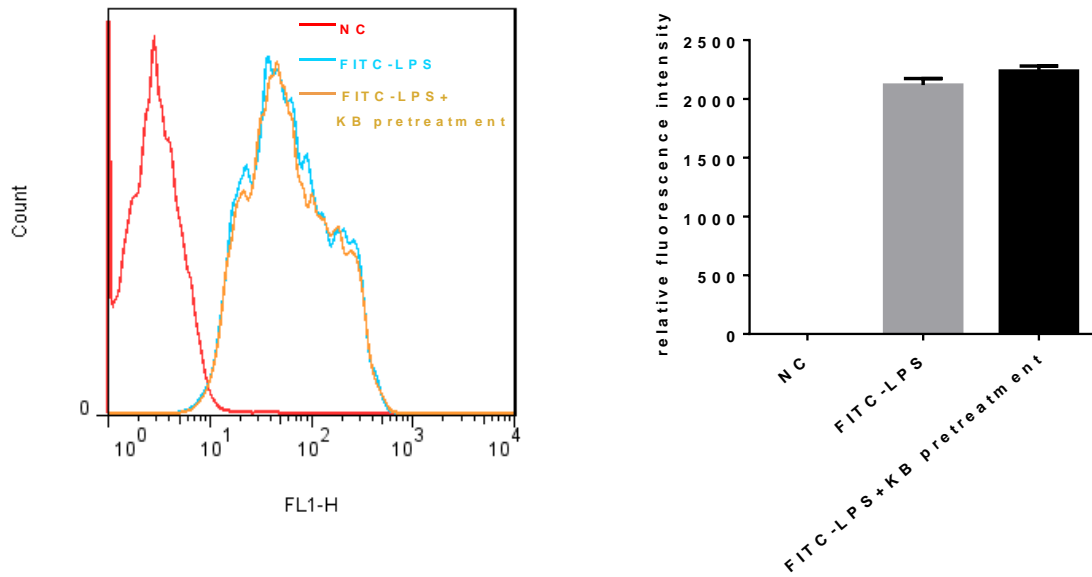

**Figure S3: Pretreatment with KB did not affect the uptake of free LPS in HCs.** HCs from WT mice were untreated (NC), or treated with FITC-LPS (1  $\mu\text{g/ml}$ ) or treated with FITC-LPS after preincubation by KB (15  $\mu\text{M}$ ) for 2 h. The uptake was detected by flow cytometry 1h after LPS treatment.

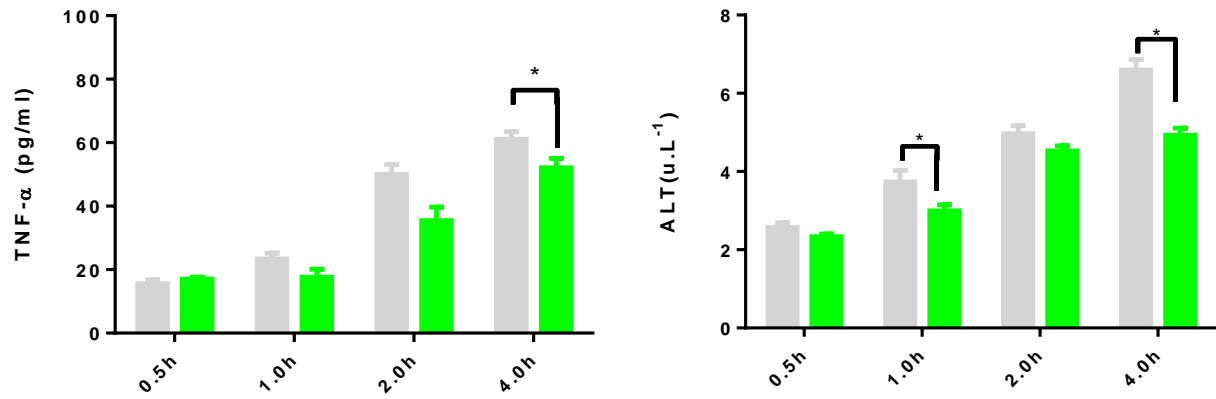

**Figure S4: KB inhibits the release of TNF- $\alpha$  and ALT from LPS-stimulated HepG2 cells.**

HepG2 cells were treated with LPS (1  $\mu\text{g/ml}$ ) preincubated with or without KB (15  $\mu\text{M}$ ). Supernatants were collected at 0.5, 1, 2 or 4 h. TNF- $\alpha$  levels were detected by ELISA, and ALT activity was detected via automatic biochemical analyzer. \* $P < 0.01$ .
